1 **Improvements in estimating bioaccumulation metrics in**  
2 **the light of toxicokinetics models and Bayesian inference**

3 **Aude Ratier<sup>1,2</sup> · Christelle Lopes<sup>1</sup> ·**  
4 **Sandrine Charles<sup>1,\*</sup>**

5

6 the date of receipt and acceptance should be inserted later

7 **Funding:** The authors are thankful to ANSES for providing the financial  
8 support for the development of the MOSAIC<sub>bioacc</sub> web tool (CNRS contract  
9 number 208483). This work is part of the ANR project APPROve (ANR-18-  
10 CE34-0013) for an integrated approach to propose proteomics for biomoni-  
11 toring: accumulation, fate and multi-markers ([https://anr.fr/Projet-ANR-18-](https://anr.fr/Projet-ANR-18-CE34-0013)  
12 [CE34-0013](https://anr.fr/Projet-ANR-18-CE34-0013)). A large part of the work benefited from the French GDR “Aquatic  
13 Ecotoxicology” framework which aims at fostering stimulating scientific dis-  
14 cussions and collaborations for more integrative approaches. At last, this work  
15 was made with the financial support of the Graduate School H2O’Lyon (ANR-  
16 17-EURE-0018) and “Université de Lyon” (UdL), as part of the program “In-  
17 vestissements d’Avenir” run by “Agence Nationale de la Recherche” (ANR).

1

Université de Lyon, Université Lyon 1, CNRS UMR5558, Laboratoire de Biométrie et Biologie Evolutive, 69100 Villeurbanne, France.

2

Institut National de l’Environnement Industriel et des Risques (INERIS), Parc ALATA BP2, 60550 Verneuil en Halatte, France.

\*Corresponding author: E-mail: [sandrine.charles@univ-lyon1.fr](mailto:sandrine.charles@univ-lyon1.fr)

18 **Acknowledgments:** This work benefited from the French GDR “Aquatic  
19 Ecotoxicology” framework which aims at fostering stimulating scientific dis-  
20 cussions and collaborations for more integrative approaches. This work was  
21 performed using the computing facilities of the CC LBBE/PRABI.

## 22 **abstract**

23 The surveillance of chemical substances in the scope of Environmental Risk  
24 Assessment (ERA) is classically performed through bio-assays from which data  
25 are collected and then modelled. Some statistical analysis base on the fitting  
26 of toxicokinetic (TK) models to assess the bioaccumulative capacity of chem-  
27 ical substances via the estimation of bioaccumulation metrics as required by  
28 regulatory documents. Given that bio-assays are particularly expensive and  
29 time consuming, it is of crucial importance to deeply benefit from all informa-  
30 tion contained in the data. By revisiting the calculation of bioaccumulation  
31 metrics under a Bayesian framework, this paper presents improvements in the  
32 classification of the bioaccumulative capacity of chemical substances. A meta-  
33 analysis of a data-rich TK database was performed, considering the uncer-  
34 tainties around the bioaccumulation metrics. The subsequent results appeared  
35 sufficiently statistically robust to propose the replacement of the single me-  
36 dian estimate to decide of the class to which assign a chemical substance. The  
37 main recommendation is to use the 75<sup>th</sup> percentile of the uncertainty interval  
38 of the bioaccumulation metrics, which revealed a better criterion to classify a  
39 chemical substance, and in the same way as the conventional method in 90%  
40 of cases.

41 **Keywords:** Environmental Risk Assessment, classification of chemical sub-  
42 stances, REACH regulation, accumulation-depuration test.

## 43 **1 Introduction**

44 Chemical substances, present in the environment as a result of human ac-  
45 tivities, are of extreme concern due to their persistence, to their capacity in  
46 accumulating within non-target living organisms and to their potential toxic-  
47 ity on the different levels of biological organization all along trophic chains  
48 (Cousins et al., 2019; Popek, 2018). In particular, this reveals crucial to bring  
49 reliable and precise information on the bioaccumulative capacity of the dif-  
50 ferent chemical substances, on what depend the concentrations internalized  
51 by organisms almost exclusively. This stage then conditions the way in which  
52 relevant links can be established between the exposure concentrations and the  
53 likely damages on life-history traits (Arnot and Gobas, 2006; Chojnacka and  
54 Mikulewicz, 2014; Armitage et al., 2021).

55 In Europe, chemical substances are governed by the REACH regulation,  
56 adopted by the European Union to improve the protection of human health  
57 and the environment from the risks that can be raised by chemical substances  
58 (European Commission, 2006). In principle, REACH applies to all chemical  
59 substances, also stipulating the need to reduce animal testing. To comply with  
60 the regulation, manufacturers must identify and manage the risks linked to  
61 the chemical substances in demonstrating that they can be safely used. For  
62 example, in order to evaluate the bioaccumulative capacity of chemical sub-  
63 stances, produced or imported above 100 tonnes per year, the REACH regula-  
64 tion requires the calculation of bioaccumulation metrics. According to Ratier  
65 et al. (2021b), we use the generic expression “bioaccumulation metrics” to de-  
66 note either bio-concentration factors (BCF) used when exposure is via water,  
67 biota-sediment accumulation factors (BSAF) when exposure is via sediment  
68 or biomagnification factors (BMF) when exposure is via food. For substances  
69 produced or imported between 10 and 100 tonnes per year, bioaccumulation

70 metrics are not mandatory but still required to classify chemical substances  
71 as persistent, bioaccumulative and toxic (abbreviated PBT) or very persistent  
72 and very bioaccumulative (abbreviated vPvB). Most of European countries  
73 classify substances as bioaccumulative (abbreviated “B”) if the bioaccumula-  
74 tion metric is in  $[2000; 5000[$ , or very bioaccumulative (abbreviated “vB”) if it  
75 is  $> 5000$  (European Commission, 2006). Other regulations around the world  
76 (Saito et al., 2011; Government of Canada, 1999; Agency, 1979) classify as “B”  
77 a chemical substance with a bioaccumulation metric ranging in  $[1000; 5000[$ .  
78 Chemical substances with a bioaccumulation metric in  $]1000; 2000[$  are always  
79 classified as low bioaccumulative (abbreviated as “ $\ell$ B”). These classifications  
80 are summarized in Wassenaar et al. (2020) and by Hartmann et al. (2014).

81 Bioaccumulation metrics are calculated from toxicokinetic (TK) parame-  
82 ter estimates by fitting a TK model (usually a one-compartment model) to  
83 experimental data collected during bioaccumulation tests (*e.g.*, OECD (2008,  
84 2012)). Bioaccumulation tests provide internal concentration measurements  
85 from two-phase experiments: a first phase (the “accumulation” phase) during  
86 which organisms are exposed via one or several uptake route(s) (water, pore  
87 water, sediment and/or food) to a given chemical substance, kept constant  
88 over time; a second phase (the “depuration” phase) during which organisms  
89 are transferred into a clean medium where elimination processes take place.  
90 The TK model is expected to account for all uptake routes and elimination  
91 processes (including excretion, dilution by growth and/or metabolization) to  
92 better describe the overall kinetics in terms of internal concentrations. From  
93 TK parameter estimates (namely, uptake and elimination rates), two types of  
94 bioaccumulation metrics can be calculated: the “kinetic” bioaccumulation met-  
95 ric, as the ratio between uptake and elimination rates; and the “steady-state”  
96 bioaccumulation metric as the ratio of the internal concentration at steady  
97 state and the constant exposure concentration; the steady state is defined as

98 the plateau concentration that is expected at the end of the accumulation  
99 phase. In theory, the “steady-state” bioaccumulation metric should be calcu-  
100 lated only if the internal concentrations measured at the last three time points  
101 of the accumulation phase are not significantly different.

102 In addition to the experimental procedure of bioaccumulation tests, the  
103 OECD guidelines also explain how to obtain bioaccumulation metrics depend-  
104 ing on the exposure routes that have been considered within the experiments.  
105 If a one-compartment TK model is often sufficient. So, in case the goodness  
106 of fit is poor this may be an indication that first order kinetics does not ap-  
107 ply suggesting that a more complex model should be employed. For example,  
108 one of the most common complexities to account for is fish growth during  
109 the bioaccumulation test (OECD, 2012). Surprisingly, in such a case, guide-  
110 lines only recommend to seek advice from bio-statistician and/or pharmaco-  
111 kineticist experts. In addition, very few tools exist to easily perform TK anal-  
112 yses. To name but a few, there are the Excel macro by Gobas et al. (2020),  
113 the “bcmfR” package (OECD, 2012) and the free open-source MOSAIC<sub>bioacc</sub>  
114 web service (<http://umr5558-shiny.univ-lyon1.fr/mosaic-bioacc/>) that  
115 has been recently updated (Ratier et al., 2021b; Charles et al., 2021a). Only  
116 MOSAIC<sub>bioacc</sub> is entirely generic whatever the species-compound combination  
117 of interest, allowing to account for different exposure routes and several elim-  
118 ination processes simultaneously, automatically adapting the fitted TK model  
119 according to the input experimental data. It provides all possible bioaccumu-  
120 lation metrics accordingly, namely BCF, BSAF and/or BMF.

121 Recently, the European Food Safety Authority (EFSA) strongly advocated  
122 the need to associate uncertainties with model parameter estimates (EFSA Sci-  
123 entific Committee, 2018) in general, emphasizing this need for toxicity indica-  
124 tors in particular (Ockleford et al., 2018). This requirement is complementary  
125 to the previous regulation with regard to the bioaccumulation metrics. Indeed,

126 for the authorisation dossiers of active chemical substances, the current regu-  
127 latory document only ask for a single mean or a median value as bioaccumu-  
128 lation metrics (European Commission, 2013). Such a practice is still common  
129 today, probably because of a lack of efficient and easy tools to handle com-  
130 puter resources, specifically designed to automatically provide uncertainties  
131 on any model output. However, recent recommendations have clearly been es-  
132 tablished when using toxicokinetic-toxicodynamic (TKTD) models (Baudrot  
133 and Charles, 2019), while Charles et al. (2021b) highlighted how critical it  
134 is to take uncertainty into account when assessing the toxicity of a chemical  
135 substance to a range of non-target terrestrial plants thus revisiting the species  
136 sensitivity distribution (SSD) approach.

137 Today, when bioaccumulation metrics need to be estimated, *MOSAIC<sub>bioacc</sub>*  
138 is one of the only tools in support of a facilitated in-depth quantification of  
139 the uncertainties; on the contrary, Gobas et al. (2020) tool only gives a stan-  
140 dard deviation. While available on-line since May 2020, the number of users  
141 of *MOSAIC<sub>bioacc</sub>* is continuously growing all over the world, whether they  
142 are from academia, regulatory bodies or industry (380 recordings these last  
143 6 months). A publicly available database accompanies the *MOSAIC<sub>bioacc</sub>* ser-  
144 vices ([http://umr5558-shiny.univ-lyon1.fr/mosaic-bioacc/data/database/  
145 index\\_readme.html](http://umr5558-shiny.univ-lyon1.fr/mosaic-bioacc/data/database/index_readme.html)), with more than 200 accumulation-depuration data sets  
146 collected within published scientific papers (Ratier and Charles, 2021). All  
147 data sets are automatically analyzed with *MOSAIC<sub>bioacc</sub>*, full analysis reports  
148 being made available via the database directly. This database is dynamically  
149 supplemented as new data sets are retrieved from the recent scientific litera-  
150 ture, or directly deposited by researchers upon request.

151 The aim of the present paper is to propose improvements in the estimation  
152 of bioaccumulation metrics in association with the quantification of their un-  
153 certainty with the perspective to reinforce the statistical foundations leading

154 to the classification of chemical substances as (low, medium or very) bioac-  
155 cumulative or not. To this end, we first present the last updates brought to  
156 MOSAIC<sub>bioacc</sub>, especially an innovative prediction device that can be specif-  
157 ically used in designing new experiments in full respect of the 3R principles  
158 (Replacement, Reduction and Refinement) ensuring animal welfare and quality  
159 of science (Prescott and Lidster, 2017). Then, the added value of accounting for  
160 uncertainty of bioaccumulation metrics is underlined through a meta-analysis  
161 of the TK database associated with MOSAIC<sub>bioacc</sub>. Finally, we demonstrate  
162 how influential may be the consideration of uncertainty when classifying chem-  
163 ical substances according to the current regulatory intervals into which the  
164 bioaccumulation metric estimates fall. We conclude with a revisited workflow  
165 to improve environmental risk assessment if it would be adopted by regulatory  
166 bodies.

## 167 **2 Calculations and predictions of bioaccumulative capacity**

168 This section gives a brief overview of the different features of MOSAIC<sub>bioacc</sub>.  
169 A focus is first made on the calculation of bioaccumulation metrics. Then the  
170 new prediction tool is introduced, to close with illustrative case studies.

### 171 **2.1 Calculations of bioaccumulation metrics**

172 Recent updates have been brought to the MOSAIC<sub>bioacc</sub> web application to  
173 increase the speed of calculations and improve its user-friendliness. Above  
174 all, a new R-package is today available on the official CRAN web site (<https://CRAN.R-project.org/package=rbioacc>) that allows to similarly perform  
175 all MOSAIC<sub>bioacc</sub> calculations and graphs directly in the R software with  
176 ready-to-use dedicated functions (Ratier et al., 2021a). The new version of  
177 MOSAIC<sub>bioacc</sub> has entirely been rewritten to reduce the length of the source  
178

179 code and take advantage of this new package. Above all, *MOSAIC<sub>bioacc</sub>* is now  
180 based on a tabbed presentation that clarifies and facilitates browsing from one  
181 step to the next. A special tab gives all bioaccumulation metrics, appropriately  
182 calculated according to the input observed data that the user has uploaded.  
183 By default, the kinetics BCF, BSAF or BMF values are delivered, displayed  
184 via their entire posterior probability distribution then summarized with their  
185 median (that is the 50% quantile) and their 95% uncertainty interval (bounded  
186 by the 2.5 and 97.5% quantiles). In addition, users can ask for the steady-state  
187 corresponding bioaccumulation metrics if they consider it relevant according  
188 to the duration of the accumulation phase, and the fact of having actually  
189 reached the plateau.

## 190 2.2 Prediction of bioaccumulation matrices to optimize experiments

191 A new prediction tab have been added to *MOSAIC<sub>bioacc</sub>* that allows interac-  
192 tive simulations of a TK model under a constant or a time-variable exposure  
193 profile. The main aim of this prediction tool is to assist experimenters in opti-  
194 mizing the design of new experiments, based on previous TK analyses. Indeed,  
195 when studying a new chemical substance and/or a new species, when study-  
196 ing a new chemical substance and/or a new species, some information needed  
197 to be known in advance in full respect of scientific ethic in terms of experi-  
198 ment on living organisms and chemical use and recycling. For example, the  
199 exposure concentration, the duration of the accumulation and the depuration  
200 phases as well as the number of time points at which internal concentrations  
201 should be primarily measured need to be defined in advance. Then, based on  
202 previous TK analyses for given close species/compound combinations, TK pa-  
203 rameter estimates can serve to simulate what could be expected when planing  
204 additional time points and/or extending the accumulation phase for example.



205 Above all, benefiting of the Bayesian framework, the uncertainty around pa-  
206 rameter estimates can be propagated towards predictions and any function  
207 of the parameters (Baudrot and Charles, 2019), in a way that is particularly  
208 useful when environmentally realistic exposure scenarios have to be run in  
209 numbers.

### 210 2.3 Illustrations with case studies

211 We provide a collection of case studies as supplementary information (SI, see  
212 the .pdf file) to illustrate various situations where the prediction tool can be  
213 helpful:

214 **Case study 1** Plan an experiment for an already studied species exposed to  
215 a different but chemically similar compound (*i.e.*, with a mode of action  
216 expected to be close), without accounting for the parameter uncertainty;

217 **Case study 2** Compare several species exposed to a same chemical substance  
218 accounting for the uncertainty around parameter estimates coming from  
219 a previous TK analysis conducted on a species phylogenetically (or tax-  
220 onomically) close to the new set of interest. In such a case, the user will  
221 need to enter the required input information but also a tabular file with  
222 the joint posterior distribution of the parameters, either coming from a  
223 previous MOSAIC<sub>bioacc</sub> TK analysis or a home-made TK implementation.

224 **Case study 3** A prediction for a same species/compound combination but  
225 for different exposure scenarios for which the user may have observed data  
226 to which simulations can be compared as a validation step of the exploited  
227 TK model.

### 228 **3 Matter of uncertainty in estimating bioaccumulation metrics**

229 Regarding accumulation-depuration data, one output of great interest is the  
230 bioaccumulative capacity of a chemical substance which is assessed through  
231 the appropriate bioaccumulation metrics according to the exposure route(s)  
232 (either the BCF, the BSAF and/or the BMF). So, benefiting of the probability  
233 distributions of these metrics (coming from the propagation of the parameter  
234 uncertainty) is crucial to catch their precision. This latter may indeed influence  
235 the classification of the substance as bioaccumulative or not, and if bioaccu-  
236 mulative, influence the choice between “B” or “vB” categories. In order to  
237 illustrate this critical issue for ERA, we present below a meta-analysis of the  
238 TK database associated to MOSAIC<sub>bioacc</sub> (Ratier and Charles, 2021).

#### 239 3.1 The accumulation-depuration TK database

240 The TK database currently contains 211 accumulation-depuration data sets  
241 collected from a literature review and corresponding to a total of 56 studies.  
242 The 211 data sets encompass 52 genus, 124 chemical substances, three different  
243 exposure routes (water being the main one, sediment and food), 34 data sets  
244 with also biotransformation data (that is metabolization data). Figure 1 shows  
245 several tree maps performed with the `treemap` R-package (Tennekes, 2017)  
246 allowing to visualise the proportion of each chemical category (Figure 1-a) and  
247 each genus (Figure 1-b) among the 211 data sets. Pesticides and hydrocarbons  
248 are the most represented chemical substances within the TK database, what  
249 can be explained by the predominance of data sets on freshwater invertebrates  
250 and fish. *Gammarus* and *Daphnia* are the most represented genus, probably  
251 due to less ethic exigence with them, while fish studies are rarer. *Gammarus*  
252 and *Daphnia* are also the genus for which the most biotransformation data are  
253 available.

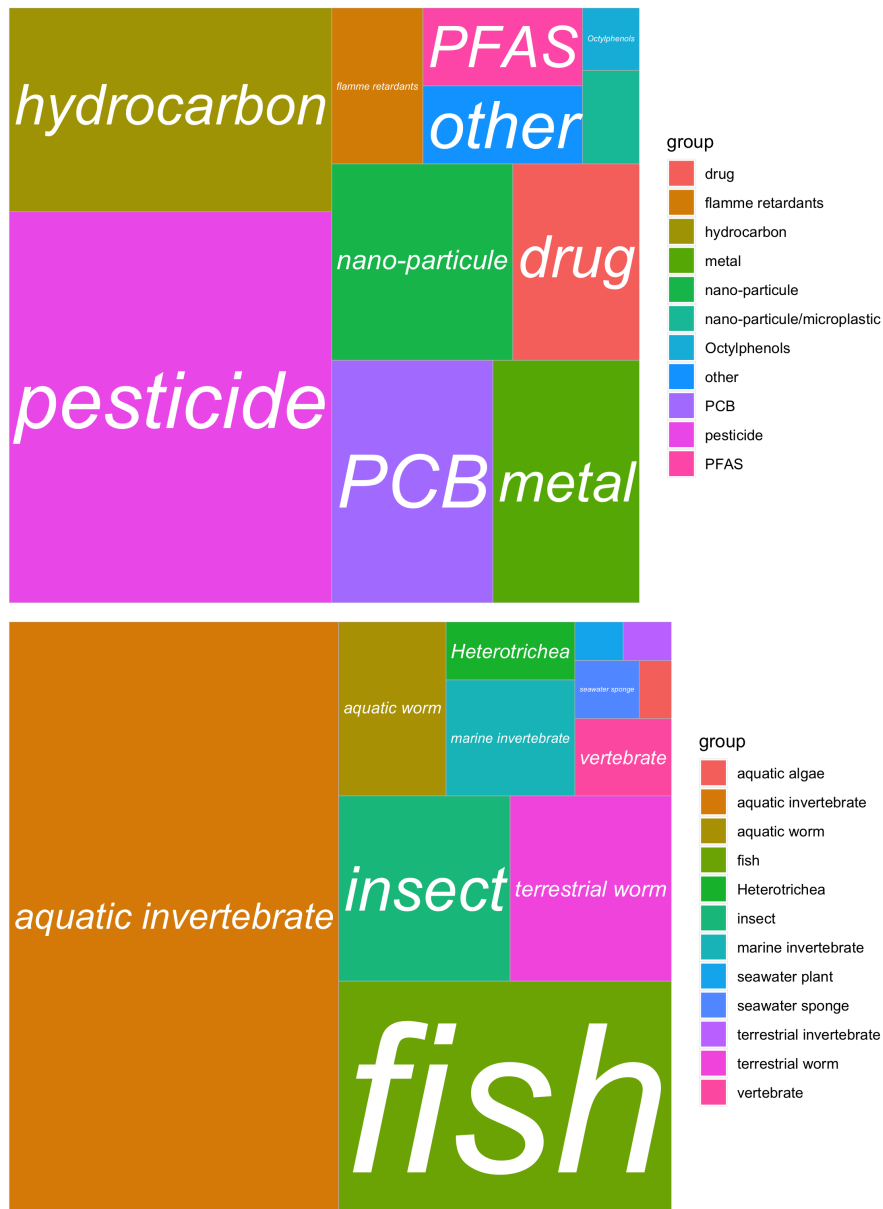

**Fig. 1** Tree maps of chemical categories (upper panel) and genus categories (lower panel) available in the TK database available at [http://lbbe-shiny.univ-lyon1.fr/mosaic-bioacc/data/database/TK\\_database.html](http://lbbe-shiny.univ-lyon1.fr/mosaic-bioacc/data/database/TK_database.html).

254 The 211 data sets of the TK database were fully analysed with MOSAIC<sub>bioacc</sub>.  
255 Corresponding reports are available from the database itself, as well as refer-  
256 ences from which data have been extracted. From these analyses, we conducted  
257 a meta-analysis of the bioaccumulation metrics to specifically illustrate how  
258 much accounting for uncertainty matters when characterizing the bioaccumu-  
259 lation capacities of chemical substances.

### 260 3.2 Meta-analysis of the TK database

261 Even if not required within regulatory documents, associate the uncertainty  
262 to a bioaccumulation metric is of crucial importance (Wassenaar et al., 2020).  
263 Among the 211 data sets, a total of 137 corresponds to an exposure via wa-  
264 ter for which the MOSAIC<sub>bioacc</sub> analysis then provides a BCF probability  
265 distribution. Based on the median and the 95% uncertainty interval of these  
266 BCF estimates (Figure 2), aquatic invertebrates have the highest values, when  
267 predominantly exposed to pesticides or metals, among which the genus *Gam-*  
268 *marus* has the most BCF estimates greater than 5000, classifying the corre-  
269 sponding chemical substances as “vB”. The SI (see the .html file) provides an  
270 additional figure with all the 211 estimated bioaccumulation metrics, without  
271 distinguishing BCF from BSAF and BMF estimates. Note that from this Fig-  
272 ure, we would have concluded to similar trends. On the other hand, based on  
273 the median of the BCF estimates as required by the regulation, only 22.7%  
274 of the BCF values classify chemical substances as “B”, that is with BCF me-  
275 dians higher than 1000. Nevertheless, as a matter of fact, this classification  
276 does not account for the precision of the BCF estimates. Hence, this raises the  
277 question of using another criterion to decide whether a chemical substance is  
278 bioaccumulative or not, and at which bioaccumulative capacity.

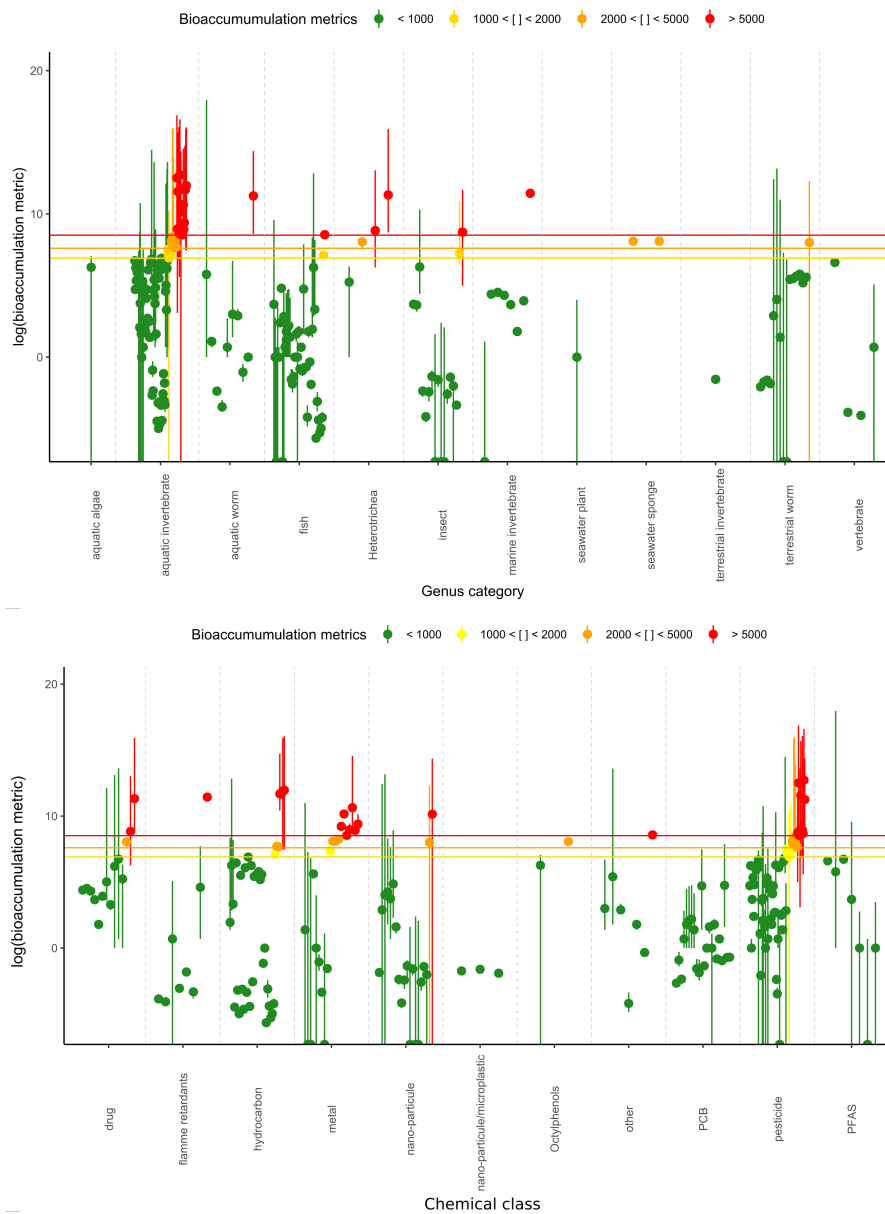

**Fig. 2** Bioaccumulation metrics (in  $\log_{10}$  scale) according to genus (upper panel) and chemical (lower panel) categories. Dots represent medians of the bioaccumulation metrics, while vertical segments represent the associated 95% uncertainty intervals. Horizontal lines delineate regulatory threshold values used in the regulation (1000, 2000 and 5000, respectively) to classify chemical substances according to their bioaccumulative capacity. Bioaccumulation metrics are colored accordingly: in green when the metric is  $< 1000$ ; in yellow if the metric is in  $[1000; 2000]$ ; in orange if the metric is in  $[2000; 5000]$ ; in red if the metric is  $> 5000$ .

### 279 3.3 Towards improvements in ERA

280 Accounting for the precision of the bioaccumulation estimates relies on the use  
281 of their probability distribution, that can be brought into play to define a new  
282 decision criterion for the classification of chemical substances.

283 Instead of the median only, we first envisaged to consider the upper bound  
284 of the uncertainty interval around the bioaccumulation metric estimates, that  
285 is the 97.5% quantiles of their posterior probability distributions (referred as  
286 Q97.5 in Table 1). This raised the question of an overestimation of the bioac-  
287 cumulative capacity of the chemical substances. Indeed, the number of BCF  
288 values doubled from 22 to 45 in the “vB” category (Table 1). Such a criterion  
289 would classify 36.5% of the chemical substances as bioaccumulative ( $n = 77$ ),  
290 against only 22.7% ( $n = 48$ ) with the usual criterion based on the median  
291 estimate (referred as Q50 in Table 1). In terms of safety prediction, this could  
292 be acceptable but still based on a biased interpretation of the bioaccumulative  
293 capacity.

**Table 1** Number of chemical substances in each bioaccumulative capacity class according to the three decision criteria built on the 50%, the 75% or the 97.5% quantiles of the posterior probability distributions of the bioaccumulation metric estimates: Q50, Q75 and Q97.5, respectively. Abbreviations  $\ell$ B stands for low bioaccumulative, B for bioaccumulative and vB for very bioaccumulative, respectively.

| Criterion | $\ell$ B ( $BCF \in [1000; 2000]$ ) | B ( $BCF \in [2000; 5000]$ ) | vB ( $BCF > 5000$ ) |
|-----------|-------------------------------------|------------------------------|---------------------|
| Q50       | 10                                  | 16                           | 22                  |
| Q75       | 11                                  | 20                           | 30                  |
| Q97.5     | 10                                  | 22                           | 45                  |

294 Again in the perspective of exploiting the uncertainty on bioaccumulation  
295 metric estimates to build a new classification criterion of chemical substances,

296 we compared the use of the 75% quantile (referred as Q75 in Table 1) to the  
297 use of the usual Q50 or the previous Q97.5, as an alternative compromise.  
298 As illustrated on Figure 3, concerning the species *Daphnia magna* exposed to  
299 phenanthrene (Wang et al., 2021), the Q50 classifies as “nB” ( $BCF < 1000$ ),  
300 while both the Q75 and the Q97.5 criteria classify it as “B” ( $BCF > 1000$ ).  
301 This example illustrates the need to consider the uncertainty to avoid “false  
302 negatives”, that is chemical substances as non bioaccumulative while they  
303 have 75% of chance to be actually. Over the 211 chemical substances in the  
304 TK database, the Q75 criterion classifies a total of 28.9% of the chemical  
305 substances as “B” ( $n = 61$ ).

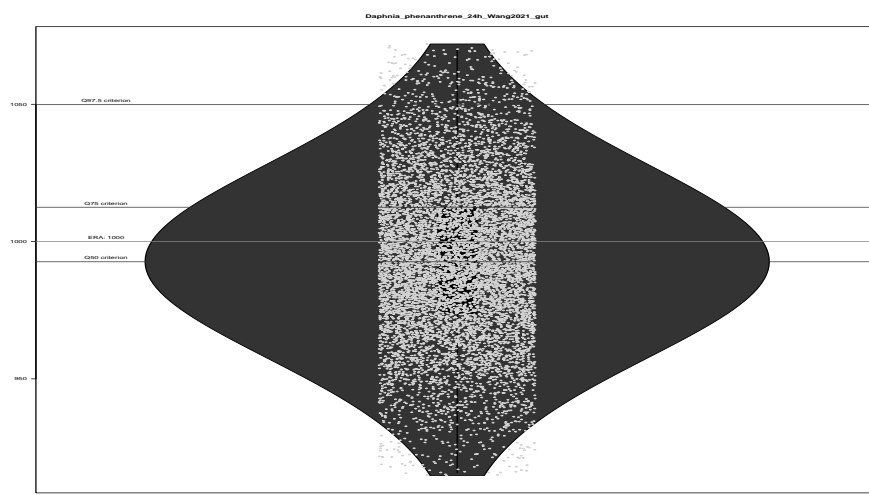

**Fig. 3** Violin plot of the bioaccumulation metric posterior probability distribution for *Daphnia magna* exposed to phenanthrene (Wang et al., 2021). The green line symbolizes the threshold value at 1000 according to regulatory ERA, while grey lines stand for the 50<sup>th</sup> (Q50 criterion in table 1), 75<sup>th</sup> (Q75 criterion) and the 97.5<sup>th</sup> (Q97.5 criterion) percentiles of the distribution, respectively.

306 Figure 4 shows another example with the genus *Enchytraeus* exposed to  
307 silver nano-particles (Topuz and van Gestel, 2015), illustrating the possible  
308 miss-classification of the bioaccumulative capacity of a chemical substance  
309 according to the Q97.5 criterion. Indeed, instead of being classified as “B”  
310 ( $BCF \in [2000; 5000]$ ), silver nano-particles are considered as non bioaccumu-  
311 lative by both the Q50 (the ERA criterion) and the alternative Q75 criteria  
312 ( $BCF < 1000$ ). In this case, the difference in the classification comes from a  
313 lack of precision of the  $BCF$  estimate which is associated with a large uncer-  
314 tainty range, that is the coefficient of variation (abbreviated as  $CV$ ) is far over  
315 0.5. This means that the  $BCF$  was delivered with a very dispersed probability  
316 distribution (Figure 4. The formula for  $CV$  writes as follows:

317 
$$CV \simeq \frac{BCF_{\text{median}}}{97.5\% \text{quantile} - 2.5\% \text{quantile}}$$

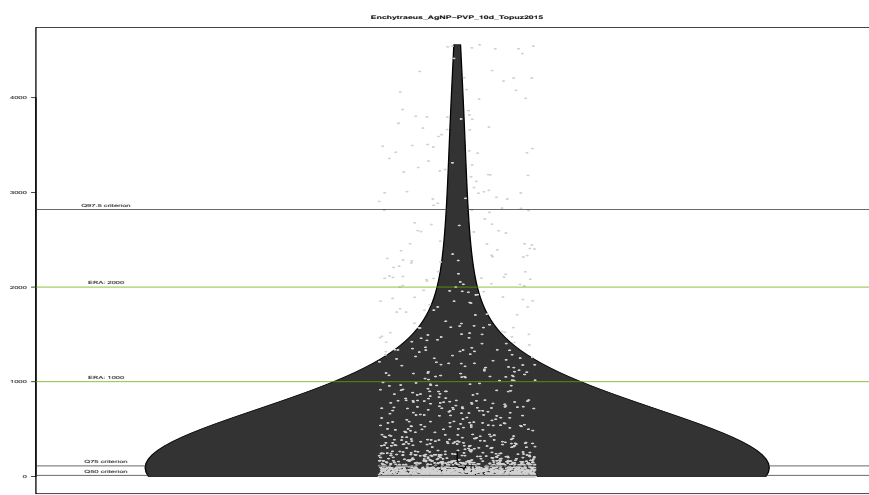

**Fig. 4** Violin plot of the bioaccumulation metric posterior probability distribution for *Enchytraeus* exposed to silver nano-particles (Topuz and van Gestel, 2015). The green lines symbolize the threshold value at 1000 and 2000 according to regulatory ERA, while grey lines stand for the 50<sup>th</sup> (Q50 criterion), 75<sup>th</sup> (Q75 criterion) and the 97.5<sup>th</sup> (Q97.5 criterion) percentiles of the distribution, respectively (Table 1).



318 Considering all the 211 data sets available, we performed the classification  
319 of all chemical substances based on each of the Q50, Q75 and Q97.5 crite-  
320 ria, and compared the results in order to formulate sufficiently well-founded  
321 recommendations. As illustrated on Figure 5 concerning the genus *Anax* ex-  
322 posed to chlorpyrifos (Rubach et al., 2010), the classification was the same  
323 whatever the criteria. In particular, we assigned more than 90% ( $n = 190$ )  
324 of the chemical substances in the same class as done with the classical Q50  
325 criterion (Table 1). These results support the use of the 75% quantile of the  
326 posterior probability distribution of the bioaccumulation metric estimates as  
327 a reasonable compromise between the classical median as currently required  
328 by the regulatory ERA, and the upper bound of the uncertainty range, while  
329 still accounting for the precision of the bioaccumulation metric estimates via  
330 the three-quarter quantile.

331 To summarize the whole database based on our recommended Q75 crite-  
332 rion, we finally classified 5.2% ( $n = 11$ ), 9.5% ( $n = 20$ ) and 14.2% ( $n = 30$ )  
333 of the chemical substances as “ $\ell$ B”, “B” and “vB”, respectively, confirming  
334 71% of the chemical substances as non bioaccumulative. Regarding the preci-  
335 sion of all bioaccumulation metrics, we got a high variability among species  
336 and chemical substances (see SI, see the .html file). Only considering the Q75  
337 criterion, 37.4% ( $n = 79$ ) of the chemical substances are associated with a  
338  $CV < 0.5$ , with the most high  $CV$  among the “nB”-classified chemical sub-  
339 stances (38.9%,  $n = 82/150$ ). This reveals that when a chemical substances is  
340 considered as bioaccumulative, what ever the class, the corresponding bioac-  
341 cumulation metric is precisely estimated in most of the cases.

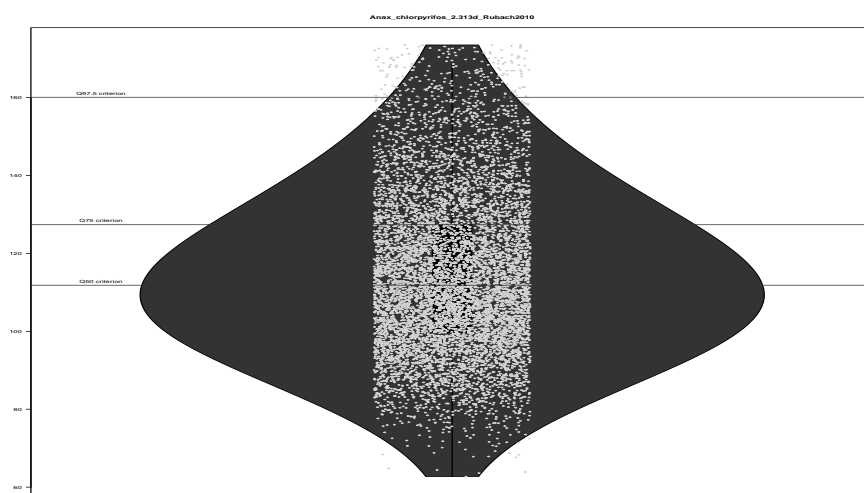

**Fig. 5** Violin plot of the bioaccumulation metric posterior probability distribution for *Anax* exposed to chlorpyrifos (Rubach et al., 2010). The green lines symbolize the threshold value at 1000 and 2000 according to regulatory ERA, while grey lines stand for the 50<sup>th</sup> (Q50 criterion), 75<sup>th</sup> (Q75 criterion) and the 97.5<sup>th</sup> (Q97.5 criterion) percentiles of the distribution, respectively (Table 1).

#### 342 **4 Conclusion**

343 Based on a meta-analysis of a TK database comprising 211 data sets, this  
344 paper establishes how crucial it is to consider the uncertainty in classifying  
345 the chemical substances according to their bioaccumulative capacity. Thanks  
346 to the fitting of TK models under a Bayesian framework, delivering bioac-  
347 cumulation metrics as probability distributions, this paper gathers together  
348 statistically-founded results towards the adoption a new criterion for this clas-  
349 sification. Indeed, it can be recommended to use the 75% quantile of the bioac-  
350 cumulation metric distributions in order to more precisely assign the chemical  
351 substances into the four regulatory ERA categories, that is as non-, low-,  
352 medium-, or very- bioaccumulative, and 90% in the same way as the current

353 approach required today. Also associated with precise estimates of bioaccu-  
354 mulation metrics, this new criterion would strongly improve ERA if it would  
355 be adopted by regulatory bodies. In addition, it could easily be implemented  
356 into the MOSAIC<sub>bioacc</sub> web service in support of the daily work of regulators  
357 when they need to quickly classify a set of several chemical substances.

### 358 **Conflict of interest**

359 The authors declare that they have no conflict of interest.

### 360 **Consent for Publication**

361 This manuscript has original research that has not been published previously  
362 and is not under consideration for publication elsewhere, in whole or in part.

### 363 **Author Contributions**

364 All authors contributed to the investigation of the TK database. Raw data  
365 collection and first analyses were performed by Aude Ratier and Sandrine  
366 Charles. The first draft of the manuscript was written by Aude Ratier and all  
367 authors commented on previous versions of the manuscript. All authors read  
368 and approved the final manuscript.

### 369 **Supplementary Information and data availability**

370 Supplementary information is available at [https://doi.org/10.5281/zenodo.](https://doi.org/10.5281/zenodo.5865150)  
371 [5865150](https://doi.org/10.5281/zenodo.5865150). All data used in this paper is downloadable from the MOSAIC<sub>bioacc</sub>  
372 web tool, directly from the associated TK database freely accessible at [http://](http://lbbe-shiny.univ-lyon1.fr/mosaic-bioacc/data/database/TK_database.html)  
373 [lbbe-shiny.univ-lyon1.fr/mosaic-bioacc/data/database/TK\\_database.](http://lbbe-shiny.univ-lyon1.fr/mosaic-bioacc/data/database/TK_database.html)  
374 [html](http://lbbe-shiny.univ-lyon1.fr/mosaic-bioacc/data/database/TK_database.html).

375 **References**

376 U. S. E. P. Agency. *Toxic Substances Control Act (TSCA) Chemical Substance*  
377 *Inventory: User guide and indices to the initial inventory: Substance name*  
378 *index*, volume 3. US Government Printing Office, 1979.

379 J. M. Armitage, L. Toose, L. Camenzuli, A. D. Redman, T. F. Parkerton,  
380 D. Saunders, J. Wheeler, A. Martin, E. Vaiopoulou, and J. A. Arnot. A  
381 critical review and weight of evidence approach for assessing the bioaccu-  
382 mulation of phenanthrene in aquatic environments. *Integrated Environmen-*  
383 *tal Assessment and Management*, n/a(n/a), 2021. doi: [https://doi.org/10.](https://doi.org/10.1002/ieam.4401)  
384 [1002/ieam.4401](https://doi.org/10.1002/ieam.4401). URL [https://setac.onlinelibrary.wiley.com/doi/](https://setac.onlinelibrary.wiley.com/doi/abs/10.1002/ieam.4401)  
385 [abs/10.1002/ieam.4401](https://setac.onlinelibrary.wiley.com/doi/abs/10.1002/ieam.4401).

386 J. A. Arnot and F. A. Gobas. A review of bioconcentration factor (bcf) and  
387 bioaccumulation factor (baf) assessments for organic chemicals in aquatic  
388 organisms. *Environmental Reviews*, 14(4):257–297, 2006. doi: [10.1139/a06-](https://doi.org/10.1139/a06-005)  
389 [005](https://doi.org/10.1139/a06-005). URL <https://doi.org/10.1139/a06-005>.

390 V. Baudrot and S. Charles. Recommendations To Address Uncertainties In En-  
391 vironmental Risk Assessment Using Toxicokinetics-Toxicodynamics Models.  
392 *Nature Scientific Report*, 9:11432, 2019. doi: [Http://Dx.Doi.Org/10.1101/](http://Dx.Doi.Org/10.1101/356469)  
393 [356469](http://Dx.Doi.Org/10.1101/356469).

394 S. Charles, A. Ratier, V. Baudrot, G. Multari, A. Siberchicot, D. Wu, and  
395 C. Lopes. Taking full advantage of modelling to better assess environmental  
396 risk due to xenobiotics. *Environmental Science and Pollution Research*,  
397 <https://ww>, 2021a.

398 S. Charles, D. Wu, and V. Ducrot. How to account for the uncertainty from  
399 standard toxicity tests in species sensitivity distributions: An example in  
400 non-target plants. *Plos One*, 16(1), 2021b. doi: [https://doi.org/10.1371/](https://doi.org/10.1371/Journal.Pone.0245071)  
401 [Journal.Pone.0245071](https://doi.org/10.1371/Journal.Pone.0245071).

- 402 K. Chojnacka and M. Mikulewicz. Bioaccumulation. In P. Wexler, edi-  
403 tor, *Encyclopedia of Toxicology (Third Edition)*, pages 456–460. Academic  
404 Press, Oxford, third edition edition, 2014. ISBN 978-0-12-386455-0. doi:  
405 <https://doi.org/10.1016/B978-0-12-386454-3.01039-3>. URL <https://www.sciencedirect.com/science/article/pii/B9780123864543010393>.  
406
- 407 I. T. Cousins, C. A. Ng, Z. Wang, and M. Scheringer. Why is high persistence  
408 alone a major cause of concern? *Environ. Sci.: Processes Impacts*, 21:781–  
409 792, 2019. doi: 10.1039/C8EM00515J. URL [http://dx.doi.org/10.1039/](http://dx.doi.org/10.1039/C8EM00515J)  
410 [C8EM00515J](http://dx.doi.org/10.1039/C8EM00515J).
- 411 EFSA Scientific Committee. Guidance on Uncertainty Analysis in Scientific  
412 Assessments. *EFSA Journal*, 16(1):1–39, 2018. doi: 10.2903/j.efsa.2018.  
413 5123.
- 414 European Commission. COMMISSION REGULATION (EU) No 1907/2006 of  
415 the European Parliament and of the Council of 18 December 2006 concern-  
416 ing the Registration, Evaluation, Authorisation and Restriction of Chemi-  
417 cals (REACH), establishing a European Chemicals Agency, amending Direc.  
418 *Official Journal of the European Union*, L 396:1–849, 2006.
- 419 European Commission. European Commission (EU) No 283/2013 of 1 March  
420 2013 setting out the data requirements for active substances, in accordance  
421 with Regulation (EC) No 1107/2009 of the European Parliament and of the  
422 Council concerning the placing of plant protection product, 2013.
- 423 F. A. Gobas, Y.-S. Lee, J. C. Lo, T. F. Parkerton, and D. J. Letinski. A toxi-  
424 cokinetic framework and analysis tool for interpreting organisation for eco-  
425 nomic co-operation and development guideline 305 dietary bioaccumulation  
426 tests. *Environmental Toxicology and Chemistry*, 39(1):171–188, 2020. doi:  
427 <https://doi.org/10.1002/etc.4599>. URL <https://setac.onlinelibrary.wiley.com/doi/abs/10.1002/etc.4599>.  
428

- 429 G. Government of Canada. Canadian environmental protection act. *Canada*  
430 *Gazette*, Part III:1–287, 1999.
- 431 N. B. Hartmann, S. Gottardo, and B. Sokull-Klüttgen. Review of available cri-  
432 teria for non-aquatic organisms within pbt/vpvt frameworks. *Publications*  
433 *Office of the European Union*, 2014.
- 434 C. Ockleford, P. Adriaanse, P. Berny, T. Brock, S. Duquesne, S. Grilli,  
435 A. F. Hernandez-Jerez, S. H. Bennekou, M. Klein, T. Kuhl, R. Laskowski,  
436 K. Machera, O. Pelkonen, S. Pieper, R. H. Smith, M. Stemmer, I. Sundh,  
437 A. Tiktak, C. J. Topping, G. Wolterink, N. Cedergreen, S. Charles, A. Focks,  
438 M. Reed, M. Arena, A. Ippolito, H. Byers, and I. Teodorovic. Scientific Opin-  
439 ion on the state of the art of Toxicokinetic/Toxicodynamic (TKTD) effect  
440 models for regulatory risk assessment of pesticides for aquatic organisms.  
441 *EFSA Journal*, 16(8):5377, 2018.
- 442 OECD. *Test No. 315: Bioaccumulation in Sediment-dwelling Benthic*  
443 *Oligochaetes*, volume 315. OECD Publishing, Paris, 2008. doi: <https://doi.org/https://doi.org/10.1787/9789264067516-en>. URL <https://www.oecd-ilibrary.org/content/publication/9789264067516-en>.
- 446 OECD. *Test No. 305: Bioaccumulation in Fish: Aqueous and Dietary Expo-*  
447 *sure*, volume 305. OECD Publishing, Paris, 2012. doi: <https://doi.org/https://doi.org/10.1787/9789264185296-en>. URL <https://doi.org/10.1787/9789264185296-en>.
- 450 E. Popek. Chapter 2 - environmental chemical pollutants. In E. Popek,  
451 editor, *Sampling and Analysis of Environmental Chemical Pollutants*  
452 *(Second Edition)*, pages 13–69. Elsevier, second edition edition, 2018.  
453 ISBN 978-0-12-803202-2. doi: <https://doi.org/10.1016/B978-0-12-803202-2.00002-1>. URL <https://www.sciencedirect.com/science/article/pii/B9780128032022000021>.  
455

- 456 M. J. Prescott and K. Lidster. Improving quality of science through better  
457 animal welfare: The NC3Rs strategy. *Lab Animal*, 46(4):152–156, 2017.  
458 ISSN 15484475. doi: 10.1038/lab.an.1217.
- 459 A. Ratier and S. Charles. Accumulation-depuration data collection in  
460 support of toxicokinetic modelling. *Scientific Data, Nature*, submitted  
461 (<https://doi.org/10.1101/2021.04.15.439942>), 2021. doi: 10.1101/2021.04.  
462 15.439942.
- 463 A. Ratier, V. Baudrot, M. Kaag, A. Siberchicot, C. Lopes, and S. Charles.  
464 rbioacc: an r-package to analyse toxicokinetic data. *bioRxiv*, 2021a. doi:  
465 10.1101/2021.09.08.459421. URL [https://www.biorxiv.org/content/  
466 early/2021/09/09/2021.09.08.459421](https://www.biorxiv.org/content/early/2021/09/09/2021.09.08.459421).
- 467 A. Ratier, C. Lopes, G. Multari, V. Mazerolles, P. Carpentier, and S. Charles.  
468 New perspectives on the calculation of bioaccumulation metrics for active  
469 substances in living organisms. *Integrated Environmental Assessment and  
470 Management*, on-line, 2021b. doi: 10.1101/2020.07.07.185835. URL [https:  
471 //www.biorxiv.org/content/early/2020/11/20/2020.07.07.185835](https://www.biorxiv.org/content/early/2020/11/20/2020.07.07.185835).
- 472 M. N. Rubach, R. Ashauer, S. J. Maund, D. J. Baird, and P. J. Van den  
473 Brink. Toxicokinetic variation in 15 freshwater arthropod species exposed  
474 to the insecticide chlorpyrifos. *Environmental Toxicology and Chemistry*, 29  
475 (10):2225–2234, 2010. doi: <https://doi.org/10.1002/etc.273>. URL [https:  
476 //setac.onlinelibrary.wiley.com/doi/abs/10.1002/etc.273](https://setac.onlinelibrary.wiley.com/doi/abs/10.1002/etc.273).
- 477 T. Saito, T. Otani, N. Seike, and M. OKAZAKI. Final act of the confer-  
478 ence of plenipotentiaries on the stockholm convention on persistent organic  
479 pollutants: Conference of plenipotentiaries on the stockholm convention on  
480 persistent organic pollutants, 2001 final act of the conference of plenipoten-  
481 tiaries on the stockholm convention on persistent organic pollutants: Confer-  
482 ence of plenipotentiaries on the stockholm convention on persistent organic  
483 pollutants, 2001, 2001. *Soil science and plant nutrition*, 57(1):157–166, 2011.

- 484 M. Tennekes. *treemap: Treemap Visualization*, 2017. URL [https://CRAN.R-](https://CRAN.R-project.org/package=treemap)  
485 [project.org/package=treemap](https://CRAN.R-project.org/package=treemap). R package version 2.4-2.
- 486 E. Topuz and C. A. van Gestel. Toxicokinetics and toxicodynamics of differ-  
487 ently coated silver nanoparticles and silver nitrate in enchytraeus crypticus  
488 upon aqueous exposure in an inert sand medium. *Environmental Toxicol-*  
489 *ogy and Chemistry*, 34(12):2816–2823, 2015. doi: <https://doi.org/10.1002/>  
490 [etc.3123](https://doi.org/10.1002/etc.3123). URL [https://setac.onlinelibrary.wiley.com/doi/abs/10.](https://setac.onlinelibrary.wiley.com/doi/abs/10.1002/etc.3123)  
491 [1002/etc.3123](https://setac.onlinelibrary.wiley.com/doi/abs/10.1002/etc.3123).
- 492 H. Wang, X. Xia, Z. Wang, R. Liu, D. C. Muir, and W.-X. Wang. Contribution  
493 of dietary uptake to pah bioaccumulation in a simplified pelagic food chain:  
494 Modeling the influences of continuous vs intermittent feeding in zooplankton  
495 and fish. *Environmental Science & Technology*, 55(3):1930–1940, 2021. doi:  
496 [10.1021/acs.est.0c06970](https://doi.org/10.1021/acs.est.0c06970).
- 497 P. N. Wassenaar, E. M. Verbruggen, E. Cieraad, W. J. Peijnenburg, and  
498 M. G. Vijver. Variability in fish bioconcentration factors: Influences of  
499 study design and consequences for regulation. *Chemosphere*, 239:124731,  
500 2020. ISSN 0045-6535. doi: [https://doi.org/10.1016/j.chemosphere.2019.](https://doi.org/10.1016/j.chemosphere.2019.124731)  
501 [124731](https://doi.org/10.1016/j.chemosphere.2019.124731). URL [https://www.sciencedirect.com/science/article/pii/](https://www.sciencedirect.com/science/article/pii/S0045653519319617)  
502 [S0045653519319617](https://www.sciencedirect.com/science/article/pii/S0045653519319617).

## 503 List of Figures

- 504 1 Tree maps of chemical categories (upper panel) and genus cat-  
505 egories (lower panel) available in the TK database available at  
506 <http://lbbe-shiny.univ-lyon1.fr/mosaic-bioacc/data/database/>  
507 [TK\\_database.html](http://lbbe-shiny.univ-lyon1.fr/mosaic-bioacc/data/database/TK_database.html). . . . . 11



---

|     |   |                                                                                             |    |
|-----|---|---------------------------------------------------------------------------------------------|----|
| 508 | 2 | Bioaccumulation metrics (in $\log_{10}$ scale) according to genus (up-                      |    |
| 509 |   | per panel) and chemical (lower panel) categories. Dots represent                            |    |
| 510 |   | medians of the bioaccumulation metrics, while vertical segments                             |    |
| 511 |   | represent the associated 95% uncertainty intervals. Horizontal                              |    |
| 512 |   | lines delineate regulatory threshold values used in the regula-                             |    |
| 513 |   | tion (1000, 2000 and 5000, respectively) to classify chemical                               |    |
| 514 |   | substances according to their bioaccumulative capacity. Bioac-                              |    |
| 515 |   | cumulation metrics are colored accordingly: in green when the                               |    |
| 516 |   | metric is $< 1000$ ; in yellow if the metric is in $[1000; 2000[$ ; in                      |    |
| 517 |   | orange if the metric is in $[2000; 5000[$ ; in red if the metric is                         |    |
| 518 |   | $> 5000$ . . . . .                                                                          | 13 |
| 519 | 3 | Violin plot of the bioaccumulation metric posterior probabilit-                             |    |
| 520 |   | ty distribution for <i>Daphnia magna</i> exposed to phenanthrene                            |    |
| 521 |   | (Wang et al., 2021). The green line symbolizes the threshold                                |    |
| 522 |   | value at 1000 according to regulatory ERA, while grey lines                                 |    |
| 523 |   | stand for the 50 <sup>th</sup> (Q50 criterion in table 1), 75 <sup>th</sup> (Q75 criterion) |    |
| 524 |   | and the 97.5 <sup>th</sup> (Q97.5 criterion) percentiles of the distribution,               |    |
| 525 |   | respectively. . . . .                                                                       | 15 |
| 526 | 4 | Violin plot of the bioaccumulation metric posterior probability                             |    |
| 527 |   | distribution for <i>Enchytraeus</i> exposed to silver nano-particles                        |    |
| 528 |   | (Topuz and van Gestel, 2015). The green lines symbolize the                                 |    |
| 529 |   | threshold value at 1000 and 2000 according to regulatory ERA,                               |    |
| 530 |   | while grey lines stand for the 50 <sup>th</sup> (Q50 criterion), 75 <sup>th</sup> (Q75      |    |
| 531 |   | criterion) and the 97.5 <sup>th</sup> (Q97.5 criterion) percentiles of the                  |    |
| 532 |   | distribution, respectively (Table 1). . . . .                                               | 16 |

533 5 Violin plot of the bioaccumulation metric posterior probability  
534 distribution for *Anax* exposed to chlorpyrifos (Rubach et al.,  
535 2010). The green lines symbolize the threshold value at 1000 and  
536 2000 according to regulatory ERA, while grey lines stand for the  
537 50<sup>th</sup> (Q50 criterion), 75<sup>th</sup> (Q75 criterion) and the 97.5<sup>th</sup> (Q97.5  
538 criterion) percentiles of the distribution, respectively (Table 1). 18

539 **List of Tables**

540 1 Number of chemical substances in each bioaccumulative capac-  
541 ity class according to the three decision criteria built on the  
542 50%, the 75% or the 97.5% quantiles of the posterior probabil-  
543 ity distributions of the bioaccumulation metric estimates: Q50,  
544 Q75 and Q97.5, respectively. Abbreviations  $\ell$ B stands for low  
545 bioaccumulative, B for bioaccumulative and vB for very bioac-  
546 cumulative, respectively. . . . . 14
